# Supplementary material
Source: publisher site journal article supplement (https://www.spandidos-publications.com/8484/downloadSupplementary)

Figure S1. Reproducibility of SERS spectra across different genomic DNA concentrations. The dot plots illustrate the coefficient of determination ( $R^2$ ) values obtained from genomic DNA at concentrations of (A) 15  $\text{ng}/\mu\text{l}$  and (B) 50  $\text{ng}/\mu\text{l}$ . The y-axis indicates the  $R^2$  values, reflecting the degree of the correlation and consistency between replicates. The x-axis denotes the specific bacterial isolate tested: MAB, MMAS, and MTB-H37Ra. Numbers (1, 2 and 3) under each isolate represent independent technical replicates. The high  $R^2$  values (mostly  $>0.8$ ) observed across both concentrations and all strains demonstrate the high precision and reliability of the method. SERS, surface-enhanced Raman spectroscopy; MAB, *M. abscessus* subspecies *abscessus*; MMAS, *M. abscessus* subspecies *massiliense*; MTB-H37Ra/H37Ra, *M. tuberculosis* H37Ra.

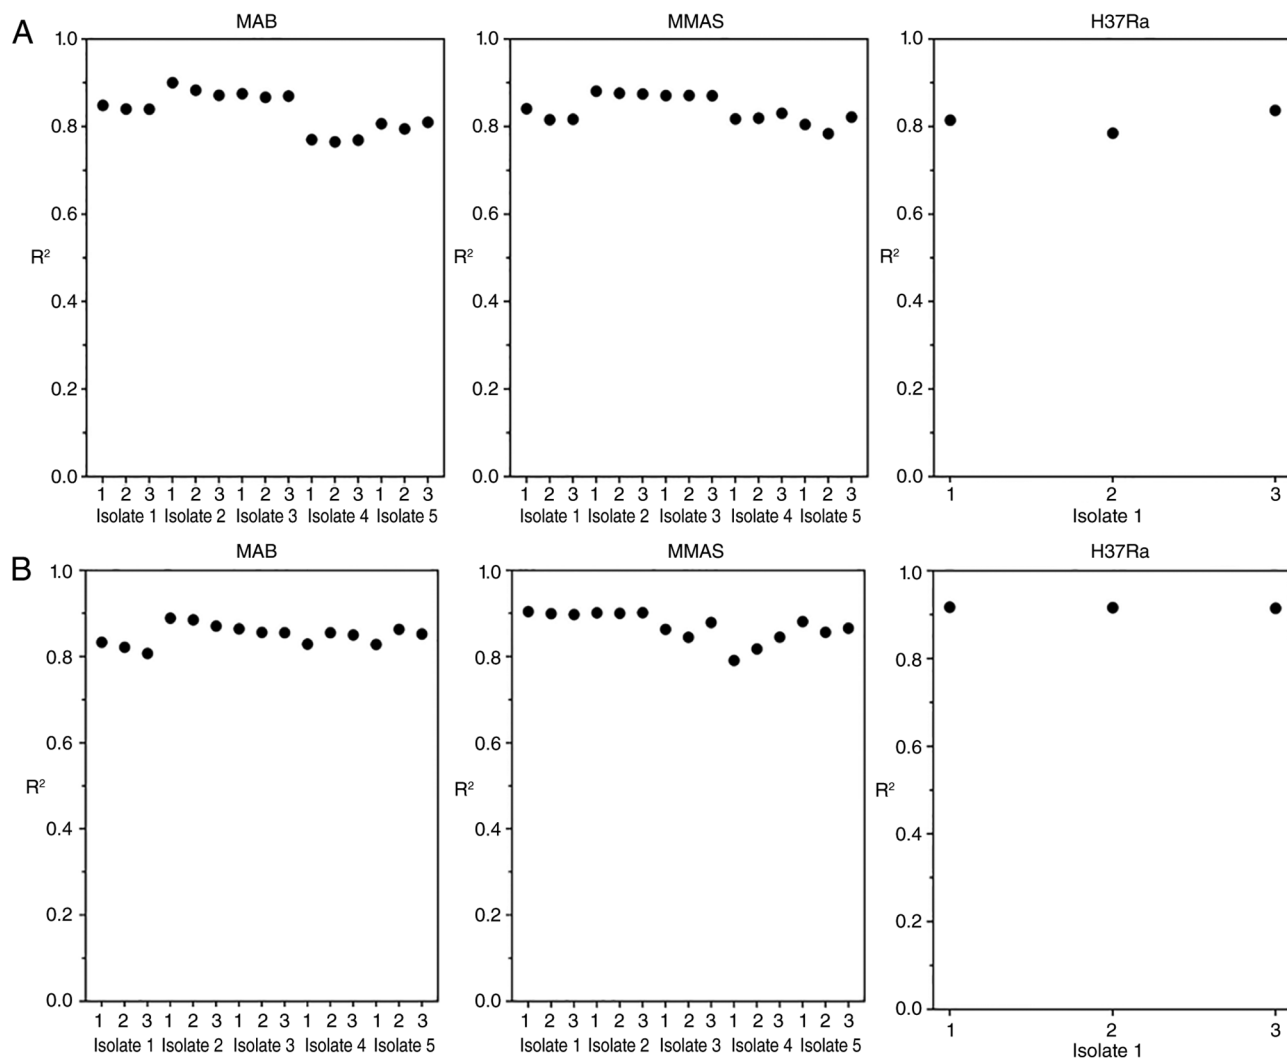

Supplement: Supplementary file 1 [file downloadSupplementary]
